# Supplementary material for: Hypertrophic Pachymeningitis in a Southern Chinese Population: A Retrospective Study
Source: Front Neurol. 2020 Nov 17;11:565088. doi: 10.3389/fneur.2020.565088 (PMC7705170; doi:10.3389/fneur.2020.565088)
Supplement: Supplementary file 2 [file Table_2.xlsx]

## Sheet: Sheet1
Supplementary Table 2. Imaging Characeteristics of Hypertrophic Pachymeningitis
Diagnosis	N	Location	Diffuse vs. focal enhancement	Roughness of enhancement
Idiopathic HP	32	Posterior fossa (15) Global(10) Cerebral falx (5) Temporal lobe (2) Unilateral hemisphere (2) Lumbar dura (2) Cavernous sinus (1) Middle fossa (1) Cervical dura (1) Occiptal lobe (1)	Diffuse (16) Focal(11) Unknown(5)	Regular (12) Irregular (15) Unknown(5)
ANCA-associated vasculitis	7	Frontal/parietal/occipital lobe (3) Temporal lobe (2) Posterior fossa(2) Global (1)	Diffuse (4) Focal(3)	Regular (6) Irregular (1)
Tuberculous meningitis	4	Posterior fossa (3) Cerebral falx (1) Frontal lobe (1) Temporal lobe (1)	Focal(4)	Regular (3) Irregular (1)
viral meningitis	3	Frontal/temporal/parietal lobe (2) Brae and cavernous sinus (1)	Diffuse (2) Focal(1)	Regular (3)
Bacterial meningitis	2	Frontal lobe (1) Frontal/parietal/occipital lobe (1) Posterior fossa(1)	Diffuse (1) Focal(1)	Regular (2)
